# Supplementary material for: Sensitive detection of synthetic cannabinoids in human blood using magnetic polydopamine molecularly imprinted polymer nanocomposites
Source: Royal Society of Chemistry journal article supplement (doi:10.1039/d3an01135f), 2023-01-01
Supplement: d3an01135f1.pdf [file d3an01135f1.pdf]

## Supplementary Material

### **Sensitive detection of synthetic cannabinoids in human blood using magnetic polydopamine molecular imprinted polymer nanocomposites**

Jiajia Li <sup>a</sup>, Yong Wang <sup>a,b</sup>, Anran Liu <sup>a</sup>, Songqin Liu <sup>a,\*</sup>

**\*Corresponding authors:**

Dr. Songqin Liu, Jiangsu Engineering Laboratory of Smart Carbon-Rich Materials and Device (CMD), Jiangsu Province Hi-Tech Key Laboratory for Bio-medical Research, School of Chemistry and Chemical Engineering, Southeast University, Nanjing, 211189, P. R. China. Email: liusq@seu.edu.cn

*a. Jiangsu Engineering Laboratory of Smart Carbon-Rich Materials and Device (CMD), Jiangsu Province Hi-Tech Key Laboratory for Bio-medical Research, School of Chemistry and Chemical Engineering, Southeast University, Nanjing, 211189, P. R. China.*

*b. Institute of Forensic Science and Technology of Nanjing Public Security Bureau, Nanjing, 210012, P. R. China.*

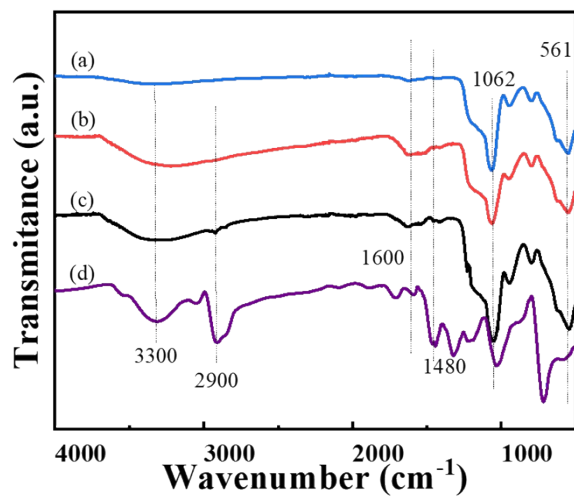

**Figure S1. FT-IR spectra of (a) Fe<sub>3</sub>O<sub>4</sub>@SiO<sub>2</sub> NPs (b) PDA@Fe<sub>3</sub>O<sub>4</sub> NIP, (c) PDA@Fe<sub>3</sub>O<sub>4</sub> MIP with 9CH embedded and (d) 9CH.**

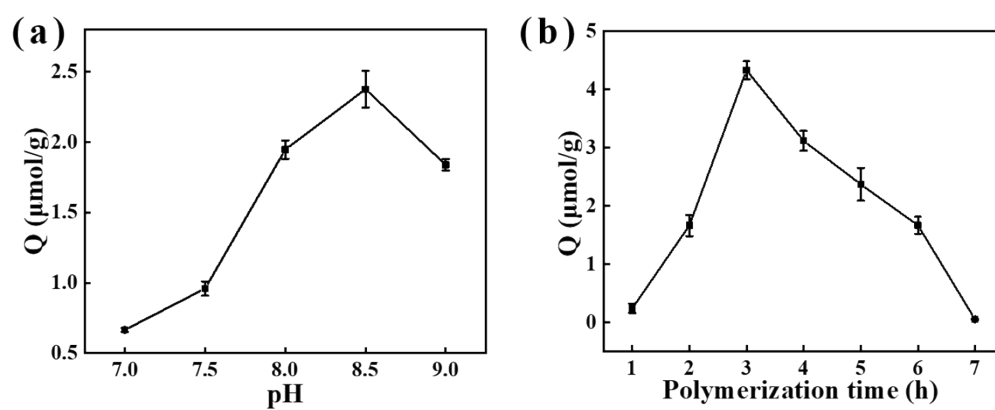

**Figure S2. Optimization of (a) pH and (b) polymerization time for the synthesis of PDA@Fe<sub>3</sub>O<sub>4</sub> MIP**

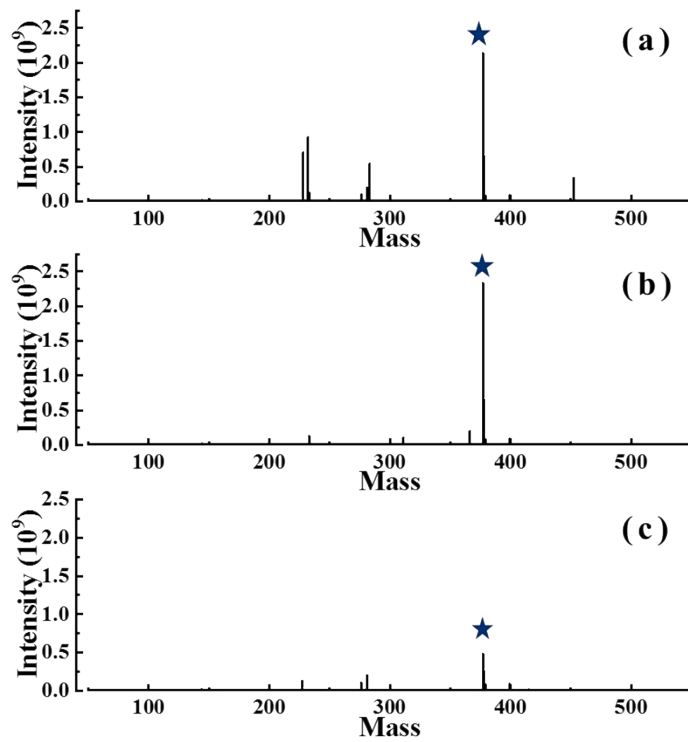

**Figure S3. Mass spectrometry is used to analyze the content of 5F-PB-22 in human blood. (a) without MIP pretreatment, (b) extracted by PDA@Fe<sub>3</sub>O<sub>4</sub> MIP, and(c) extracted by PDA@Fe<sub>3</sub>O<sub>4</sub> NIP.**

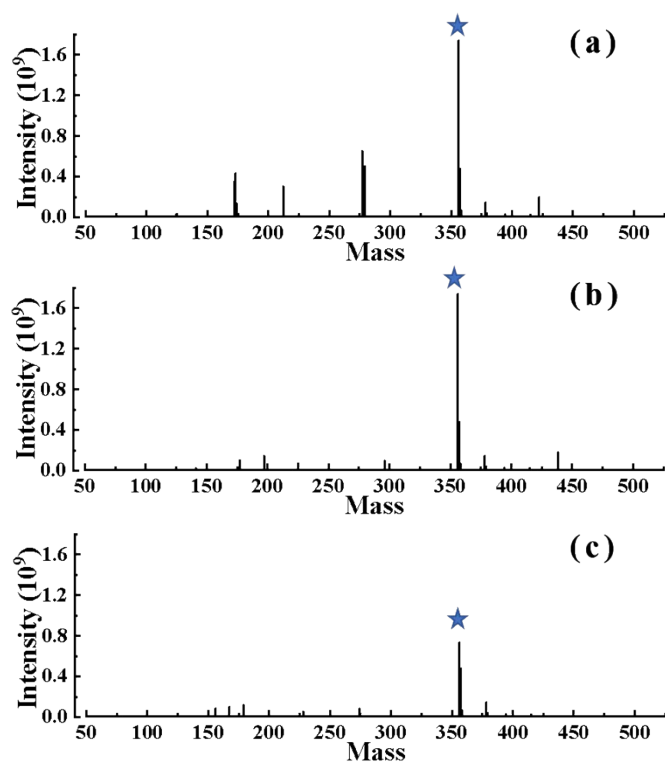

**Figure S4. Mass spectrometry is used to analyze the content of JWH-122 in human blood. (a) without MIP pretreatment, (b) extracted by PDA@Fe<sub>3</sub>O<sub>4</sub> MIP, and(c) extracted by PDA@Fe<sub>3</sub>O<sub>4</sub> NIP.**

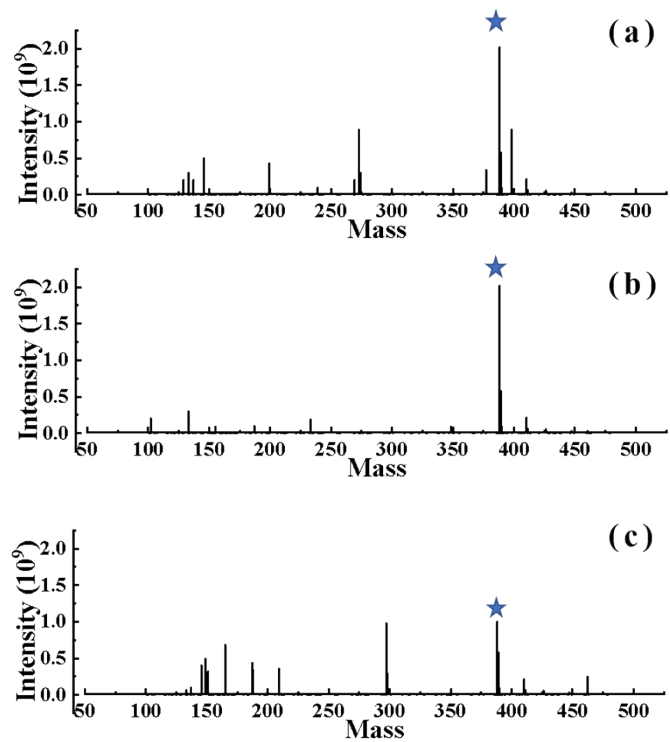

**Figure S5. Mass spectrometry is used to analyze the content of EAM-2201 in human blood. (a) without MIP pretreatment, (b) extracted by PDA@Fe<sub>3</sub>O<sub>4</sub> MIP, and (c) extracted by PDA@Fe<sub>3</sub>O<sub>4</sub> NIP.**

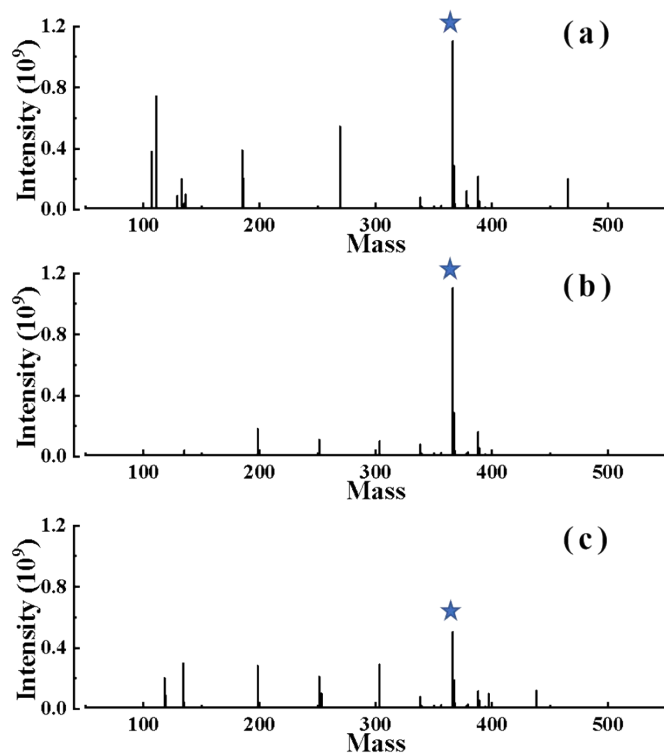

**Figure S6. Mass spectrometry is used to analyze the content of APINACA in human blood. (a) without MIP pretreatment, (b) extracted by PDA@Fe<sub>3</sub>O<sub>4</sub> MIP, and (c) extracted by PDA@Fe<sub>3</sub>O<sub>4</sub> NIP.**

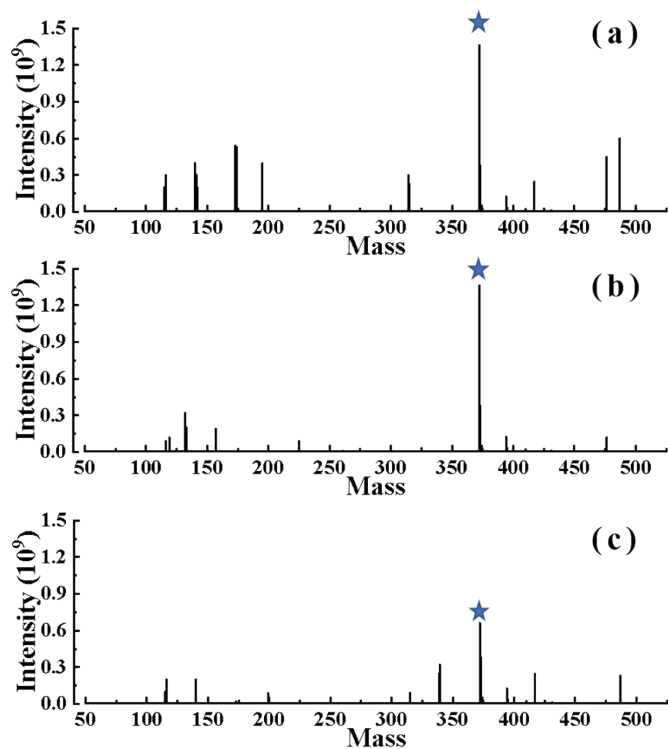

**Figure S7. Mass spectrometry is used to analyze the content of JWH-081 in human blood. (a) without MIP pretreatment, (b) extracted by PDA@Fe<sub>3</sub>O<sub>4</sub> MIP, and (c) extracted by PDA@Fe<sub>3</sub>O<sub>4</sub> NIP.**



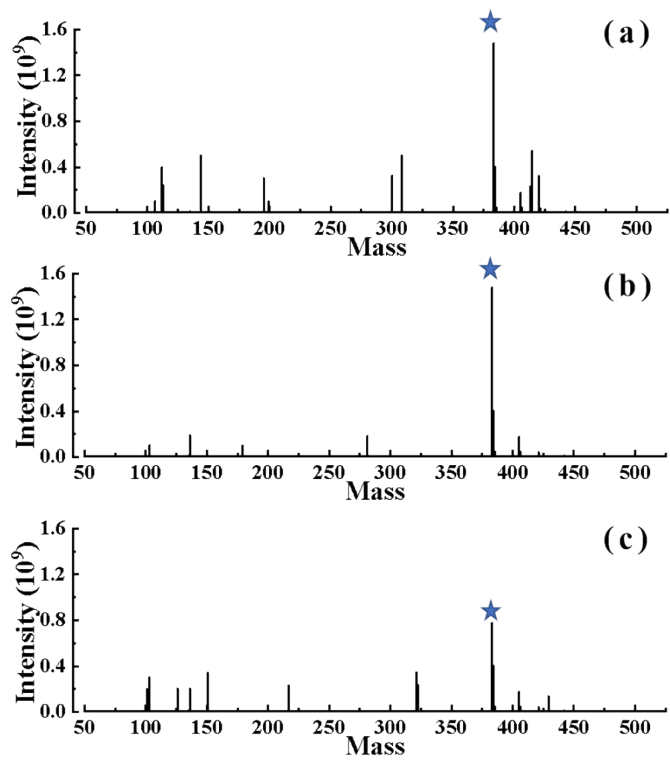

**Figure S8. Mass spectrometry is used to analyze the content of STS-135 in human blood. (a) without MIP pretreatment, (b) extracted by PDA@Fe<sub>3</sub>O<sub>4</sub> MIP, and (c) extracted by PDA@Fe<sub>3</sub>O<sub>4</sub> NIP.**

**Table S1: Conditions for liquid chromatography**

---

| HPLC parameters       |                                                                 |
|-----------------------|-----------------------------------------------------------------|
| Columns               | Agilent Eclipse plus C18<br>(3 x 100 mm x 2.1 $\mu$ m)          |
| Eluent                | A: Methanol<br>B: 5 mmol Ammonium formate / 0.1% Methanoic acid |
| Injection Volume      | 10 $\mu$ L                                                      |
| Flow Rate             | 500 $\mu$ L/mL                                                  |
| Column<br>temperature | 40 $^{\circ}$ C                                                 |

---

**Table S2: Conditions for mass spectrometry**

---

| MS parameters                          |                         |
|----------------------------------------|-------------------------|
| Polarity                               | Positive                |
| Ionization source                      | Electrospray Ionization |
| Sweep gas flow rate                    | 2 arb                   |
| Spray voltage                          | 3.5 kV                  |
| Sheath gas flow rate                   | 45 arb                  |
| Aux gas flow rate                      | 10 arb                  |
| Aux gas heater temp                    | 400 °C                  |
| Capillary temp                         | 320 °C                  |
| Resolution                             | 70000                   |
| Automatic gain control (AGC)<br>target | 2e6                     |
| Collision energy (CE)                  | 40 eV                   |
| Scan range                             | 50 to 400 m/z           |
| Maximum IT                             | 100 ms                  |

---

**Table S3. Mass spectrometric characterization parameters of six synthetic cannabinoids**

| Compounds | RT<br>(min) | Precursor ion<br>[M+H] <sup>+</sup> (m/z) | Fragmentation ions<br>(m/z) |
|-----------|-------------|-------------------------------------------|-----------------------------|
| JWH-122   | 10.37       | 356.2010                                  | 214.1227, 169.0649          |
| JWH-081   | 9.82        | 372.1954                                  | 214.1227, 185.0597          |
| EAM2201   | 5.70        | 388.2069                                  | 232.1130, 183.0804          |
| 5F-PB-22  | 8.15        | 377.1662                                  | 232.1133, 144.0444          |
| STS-135   | 15.26       | 383.2486                                  | 232.1133, 135.1169          |
| APINACA   | 8.34        | 366.2540                                  | 135.1168, 107.0855          |

**Table S4. Optimization of the ratio of Fe<sub>3</sub>O<sub>4</sub>, DA and 9CH**

| Entry | Fe <sub>3</sub> O <sub>4</sub><br>(mg) | DA<br>(mg) | 9CH<br>(mg) | Q<br>( $\mu\text{mol}\cdot\text{g}^{-1}$ ) |
|-------|----------------------------------------|------------|-------------|--------------------------------------------|
| 1     | 10                                     | 5          | 10          | 4.33                                       |
| 2     | 10                                     | 7          | 10          | 5.74                                       |
| 3     | 10                                     | 10         | 10          | 4.12                                       |
| 4     | 10                                     | 15         | 10          | 5.34                                       |
| 5     | 10                                     | 7          | 10          | 4.21                                       |
| 6     | 10                                     | 7          | 20          | 5.55                                       |
| 7     | 10                                     | 7          | 30          | 6.26                                       |
| 8     | 10                                     | 7          | 40          | 6.07                                       |

Other synthesis conditions: polymerization time = 3 h, polymerization of Tris Buffer (10 mL, pH = 8.5) solution.

The concentration of each SC is 1  $\mu\text{g}/\text{mL}$  for the adsorption capacity evaluation.
